# Supplementary material
Source: publisher site journal article supplement (https://www.dovepress.com/get_supplementary_file.php?f=267238.docx)
Supplement: Supplementary file 1 [file get_supplementary_file.php]

**Supplement Table 1** Treatment and Outcomes between Simple SARS-CoV-2

Infection and Coinfection

|  | Coinfection  (*N*=39), *n* (%) | Simple SARS-Cov-2  Infection, (*N*=211), *n* (%) | *P*# |
| --- | --- | --- | --- |
| Age in Years, Median (IQR) | 39 (30-65) | 49 (35-62) | 0.190 |
| Sex, Female | 22 (56.4) | 113 (53.6) | 0.742 |
| Azithromycin | 9 (23.1) | 26 (12.3) | 0.075 |
| Antiviral Treatment | 38 (97.4) | 198 (93.8) | 0.369 |
| Arbidol (Umifenovir) | 37 (94.9) | 185 (87.7) | 0.191 |
| Oseltamivir | 11 (28.2) | 53 (25.1) | 0.685 |
| Lopinavir/Ritonavir | 7 (17.9) | 44 (20.9) | 0.679 |
| Interferon Inhalation | 32 (82.1) | 151 (71.6) | 0.174 |
| Use of Intravenous Corticosteroids | 6 (15.4) | 43 (20.4) | 0.470 |
| Intravenous Human  Immunoglobulin | 9 (23.1) | 71 (33.6) | 0.193 |
| Oxygen Support | 26 (66.7) | 119 (56.4) | 0.233 |
| Nasal Cannula | 25 (64.1) | 119 (56.4) | 0.371 |
| High-flow Nasal Cannula | 3 (7.7) | 4 (1.9) | 0.079 |
| NPPV | 2 (5.1) | 5 (2.4) | 0.300 |
| Death | 1 (2.6) | 3 (1.4) | 0.495 |
| Time to negative SARS-CoV-2 Nucleic Acid Test Resultsa in Days, Median (IQR) | 16.0 (10.0-23.0) | 16.0 (9.8-24.0) | 0.744 |
| Peak IgM (AU/ml), Median (IQR), N=232 | 50.6 (18.3-74.4) | 71.6 (32.9-100.5) | 0.005* |
| Peak IgG (AU/ml), Median (IQR), N=244 | 112.1 (96.5-137.6) | 122.2 (108.7-139.8) | 0.056 |
| Time from Onset to Antibody Production in Days, Median (IQR) | 40.0 (32.0-58.0) | 36.0 (32.0-38.2) | <0.001* |
| Hospital Length of Stay in Days, Median (IQR) | 18.0 (12.0-25.0) | 20.0 (14.0-27.0) | 0.134 |
| Disease Severity Status at Diagnosis |  |  |  |
| Mild/Moderate | 20(51.3) | 159(75.4) | 0.002* |
| Severe/Critical | 19(48.7) | 52(24.6) |

**Notes:** # Comparison using Mann-Whitney U test, Fisher’s Exact test or χ2 test.

**P*<0.05

a Interval between first positive detection of SARS-CoV-2 nucleic acid until second consecutive negative SARS-CoV-2 nucleic acid test

**Abbreviations:** IQR, interquartile range; NPPV, noninvasive positive-pressure ventilation.
